# Supplementary material for: Orbital CO 2 reconstruction using boron isotopes during the late Pleistocene, an assessment of accuracy
Source: Copernicus journal article supplement (doi:10.5194/cp-19-2493-2023), 2023-12-12
Supplement: Supplementary file 1 [file cp-19-2493-2023-supplement.zip]

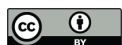

*Supplement of*

**Orbital CO<sub>2</sub> reconstruction using boron isotopes during the late Pleistocene, an assessment of accuracy**

**Elwyn de la Vega et al.**

*Correspondence to:* Elwyn de la Vega ([elwyn.delavega@universityofgalway.ie](mailto:elwyn.delavega@universityofgalway.ie); [elwyn.dlvega@gmail.com](mailto:elwyn.dlvega@gmail.com))

- [cp-19-2493-2023-supplement-title-page.pdf](#)
- [Supplementary-data-delavega-et-al-2023.xlsx](#)
- [cp-2022-93-supplement-version3.pdf](#)

The copyright of individual parts of the supplement might differ from the article licence.
