# Supplementary material for: Orbital CO 2 reconstruction using boron isotopes during the late Pleistocene, an assessment of accuracy
Source: Copernicus journal article supplement (doi:10.5194/cp-19-2493-2023), 2023-12-12
Supplement: Supplementary file 1 [file Supplementary-data-delavega-et-al-2023.xlsx]

## Sheet: Table 1.d11B pH and CO2
Supplementary Information Table 1. d11B, Mg/Ca, and input variables for calculated pH and CO2 during the late Pleistocene at core site 999 and 871.
Elevation	Site depth in meters bellow sea-level.
Age	Age in thousands of years (ky).
Species	"G. ruber ss (white)" for Globigerinoides sensu stricto white. "G. ruber sl" for Globigerinoides sensu lato.
d11B	Boron isotopic composition of foraminifera measured by MC-ICPMS (permil).
d11B.er	External uncertainty on the boron isotopic composition of foraminifera (permil).
Mg/Ca	Mg/Ca measured on foraminifera by ICPMS (mmol/mol).
Mg/Ca (corr)	Mg/Ca corrected for depth dependent dissolution (mmol/mol).
Temperature	Sea surface temperature (°C) Mg/Ca-derived including dissolution correction and pH correction.
Temp.er	Uncertainty on sea surface temperature (°C) .
Salinity	Seawater salinity
Sal.er	Uncertainty on seawater salinity
TA	Total alkalinity (mol/kg)
TA.er	Uncertainty on total alkalinity (mol/kg)
d11B (sw)	Boron isotopic composition of seawater (permil)
d11B (sw).er	Uncertainty on the boron isotopic composition of seawater (permil)
pCO2.av	pCO2 (in parts per million) calculated from d11B and corrected for local diequilibrium. "pCO2.av" is the average of the 10, 000 realisations of the Monte Carlo simulation. lwr95 and up95 are the 2.5 and 97.5 percentiles (form the 95% confidence interval lower95 and upper 95), lwr68 and up68 are the 14 and 86 percentiles (form the 68% confidence interval lower68 and upper68).
pCO2.max	pCO2 (in parts per million) calculated from d11B and corrected for local diequilibrium. "pCO2.max" is the maximum probability of the 10, 000 realisations of the Monte Carlo simulation.
pH.av	pH calculated from d11B. "pH.av" is the average of the 10, 000 realisations of the Monte Carlo simulation. lwr95 and up95 are the 2.5 and 97.5 percentiles (form the 95% confidence interval lower95 and upper 95), lwr68 and up68 are the 14 and 86 percentiles (form the 68% confidence interval lower68 and upper68).
pH.max	pH calculated from d11B. "pH.max" is the maximum probability of the 10, 000 realisations of the Monte Carlo simulation.
Leg	ODP Site	Hole	Core	Section	Top (cm)	Bottom (cm)	Area	Latitude	Longitude	Elevation (m)	Species	Data set	Age (ky)	d11B	d11B.er	Mg/Ca	Mg/Ca (corr)	Temperature	Temp.er	Salinity	Sal.er	TA	TA.er	d11B (sw)	d11B (sw).er	pCO2.av	pCO2.max	lwr95	lwr68	up68	up95	pH.av	pH.max	lwr95	lwr68	up68	up95
165	999	A	1	1	4	5	Caribbean	12.75°N	78.73°W	-2827	G. ruber ss (white)	recalculated from Chalk et al., 2017	3.91	20.67	0.18	4.14	4.74	27.2	0.75	35	1.5	0.00235	0.000175	39.6	0.1	274.395	268.836	224.182	246.899	301.874	330.083	8.15361	8.14987	8.09849	8.12582	8.18194	8.2084
165	999	A	1	1	11	13	Caribbean	12.75°N	78.73°W	-2827	G. ruber ss (white)	recalculated from Chalk et al., 2017	4.63	20.79	0.12	4.25	4.85	27.72	0.75	35	1.5	0.00235	0.000175	39.6	0.1	264.022	262.394	217.702	238.319	289.323	316.039	8.16479	8.16747	8.11463	8.13886	8.19083	8.21772
165	999	A	1	1	14.5	16.5	Caribbean	12.75°N	78.73°W	-2827	G. ruber ss (white)	recalculated from Chalk et al., 2017	5.02	20.59	0.16	4.1	4.7	26.99	0.75	35	1.5	0.00235	0.000175	39.6	0.1	281.872	280.055	230.498	254.418	309.125	338.187	8.14549	8.14427	8.09178	8.11844	8.17263	8.20019
165	999	A	1	1	31	33	Caribbean	12.75°N	78.73°W	-2827	G. ruber ss (white)	recalculated from Chalk et al., 2017	7.82	20.82	0.18	4.15	4.75	27.44	0.75	35	1.5	0.00235	0.000175	39.6	0.1	258.987	253.562	210.224	232.683	285.088	314.029	8.17162	8.16762	8.11583	8.14363	8.20017	8.22689
165	999	A	1	1	31	33	Caribbean	12.75°N	78.73°W	-2827	G. ruber ss (white)	recalculated from Chalk et al., 2017	7.82	20.72	0.22	4.15	4.75	27.31	0.75	35	1.5	0.00235	0.000175	39.6	0.1	269.456	264.556	217.043	241.444	297.886	326.868	8.15938	8.16067	8.1016	8.12899	8.18936	8.21845
165	999	A	1	1	39	41	Caribbean	12.75°N	78.73°W	-2827	G. ruber ss (white)	recalculated from Chalk et al., 2017	9.49	20.68	0.18	3.88	4.48	26.37	0.75	35	1.5	0.00235	0.000175	39.6	0.1	265.343	261.164	215.951	238.75	292.152	319.973	8.16543	8.16793	8.10889	8.13722	8.19367	8.22094
165	999	A	1	1	43	45	Caribbean	12.75°N	78.73°W	-2827	G. ruber ss (white)	recalculated from Chalk et al., 2017	10.32	20.93	0.24	3.85	4.45	26.66	0.75	35	1.5	0.00235	0.000175	39.6	0.1	240.621	240.236	192.004	214.295	267.366	296.392	8.19552	8.20105	8.13517	8.16471	8.22597	8.25621
165	999	A	1	1	48	50	Caribbean	12.75°N	78.73°W	-2827	G. ruber ss (white)	recalculated from Chalk et al., 2017	11.65	20.72	0.2	3.67	4.27	25.69	0.75	35	1.5	0.00235	0.000175	39.6	0.1	255.388	249.693	207.099	229.11	281.341	310.332	8.17829	8.17538	8.12047	8.14948	8.20691	8.23502
165	999	A	1	1	57	59	Caribbean	12.75°N	78.73°W	-2827	G. ruber ss (white)	recalculated from Chalk et al., 2017	14.01	20.98	0.18	3.81	4.41	26.48	0.75	35	1.5	0.00235	0.000175	39.6	0.1	234.026	233.091	187.967	209.579	258.847	284.014	8.20385	8.20163	8.14789	8.17541	8.23229	8.26129
165	999	A	1	1	61	63	Caribbean	12.75°N	78.73°W	-2827	G. ruber ss (white)	recalculated from Chalk et al., 2017	15.07	21.02	0.18	3.82	4.42	26.51	0.75	35	1.5	0.00235	0.000175	39.6	0.1	230.824	230.54	186.205	206.815	254.779	280.148	8.20834	8.20658	8.1528	8.17993	8.23677	8.26438
165	999	A	1	1	61	63	Caribbean	12.75°N	78.73°W	-2827	G. ruber ss (white)	recalculated from Chalk et al., 2017	15.07	21.15	0.2	3.82	4.42	26.72	0.75	35	1.5	0.00235	0.000175	39.6	0.1	219.464	215.877	176.392	196.377	243.102	268.126	8.22305	8.21769	8.16602	8.1939	8.25193	8.28089
165	999	A	1	1	71	73	Caribbean	12.75°N	78.73°W	-2827	G. ruber ss (white)	recalculated from Chalk et al., 2017	17.26	21.04	0.16	3.54	4.14	25.57	0.75	35	1.5	0.00235	0.000175	39.6	0.1	221.595	219.572	179.174	199.028	244.285	268.715	8.222	8.22363	8.16735	8.19428	8.2498	8.27739
165	999	A	1	1	82	84	Caribbean	12.75°N	78.73°W	-2827	G. ruber ss (white)	recalculated from Chalk et al., 2017	19.19	21.75	0.2	3.38	3.98	26.02	0.75	35	1.5	0.00235	0.000175	39.6	0.1	166.614	164.986	129.543	147.203	186.304	206.206	8.30527	8.30873	8.24677	8.27503	8.33567	8.36614
165	999	A	1	1	93	95	Caribbean	12.75°N	78.73°W	-2827	G. ruber ss (white)	recalculated from Chalk et al., 2017	21.12	21.23	0.14	3.28	3.88	24.87	0.75	35	1.5	0.00235	0.000175	39.6	0.1	199.707	198.574	161.146	178.663	220.15	242.403	8.25443	8.25394	8.20021	8.22713	8.28189	8.3088
165	999	A	1	1	102	104	Caribbean	12.75°N	78.73°W	-2827	G. ruber ss (white)	recalculated from Chalk et al., 2017	22.61	21.26	0.16	3.52	4.12	25.79	0.75	35	1.5	0.00235	0.000175	39.6	0.1	203.559	201.649	163.941	182.194	225.069	246.752	8.24724	8.24739	8.1931	8.21869	8.27546	8.30321
165	999	A	1	1	113	115	Caribbean	12.75°N	78.73°W	-2827	G. ruber ss (white)	recalculated from Chalk et al., 2017	24.38	21.51	0.14	3.43	4.03	25.86	0.75	35	1.5	0.00235	0.000175	39.6	0.1	183.132	181.33	146.44	164.003	202.641	223.317	8.27798	8.28177	8.22521	8.25009	8.30542	8.33466
165	999	A	1	1	120	122	Caribbean	12.75°N	78.73°W	-2827	G. ruber ss (white)	recalculated from Chalk et al., 2017	25.51	21.62	0.24	3.39	3.99	25.9	0.75	35	1.5	0.00235	0.000175	39.6	0.1	175.333	173.758	136.026	154.438	196.399	218.528	8.29116	8.29215	8.23121	8.26011	8.32254	8.35306
165	999	A	1	1	120	122	Caribbean	12.75°N	78.73°W	-2827	G. ruber ss (white)	recalculated from Chalk et al., 2017	25.51	21.69	0.16	3.39	3.99	25.99	0.75	35	1.5	0.00235	0.000175	39.6	0.1	170.722	169.489	135.205	151.766	189.587	208.959	8.29824	8.29698	8.24281	8.26944	8.32741	8.35539
165	999	A	1	2	20	22	Caribbean	12.75°N	78.73°W	-2827	G. ruber ss (white)	recalculated from Chalk et al., 2017	35.82	21.12	0.18	3.48	4.08	25.51	0.75	35	1.5	0.00235	0.000175	39.6	0.1	214.221	212.856	172.165	191.395	236.876	261.146	8.23277	8.23003	8.17671	8.20456	8.2613	8.2895
165	999	A	1	2	61	63	Caribbean	12.75°N	78.73°W	-2827	G. ruber ss (white)	recalculated from Chalk et al., 2017	46.61	21.16	0.16	3.43	4.03	25.48	0.75	35	1.5	0.00235	0.000175	39.6	0.1	210.314	210.153	169.872	188.535	231.86	255.763	8.23819	8.23089	8.18388	8.2105	8.26558	8.29332
165	999	A	1	2	82	84	Caribbean	12.75°N	78.73°W	-2827	G. ruber ss (white)	recalculated from Chalk et al., 2017	52.14	21.29	0.2	3.48	4.08	25.86	0.75	35	1.5	0.00235	0.000175	39.6	0.1	201.343	198.205	159.065	179.115	223.046	247.037	8.25044	8.25187	8.19488	8.22113	8.28014	8.30935
165	999	A	1	2	119	121	Caribbean	12.75°N	78.73°W	-2827	G. ruber ss (white)	recalculated from Chalk et al., 2017	61.28	21.31	0.28	3.57	4.17	26.17	0.75	35	1.5	0.00235	0.000175	39.6	0.1	201.844	197.224	157.807	177.495	226.107	253.481	8.2495	8.24676	8.18373	8.21633	8.28236	8.31358
165	999	A	1	3	29	31	Caribbean	12.75°N	78.73°W	-2827	G. ruber ss (white)	recalculated from Chalk et al., 2017	77.3	20.89	0.2	3.57	4.17	25.64	0.75	35	1.5	0.00235	0.000175	39.6	0.1	237.272	236.223	191.542	212.291	262.59	287.874	8.20152	8.20283	8.14523	8.17227	8.23027	8.25827
165	999	A	1	3	54	56	Caribbean	12.75°N	78.73°W	-2827	G. ruber ss (white)	recalculated from Chalk et al., 2017	84.33	20.88	0.26	3.58	4.18	25.7	0.75	35	1.5	0.00235	0.000175	39.6	0.1	238.727	240.235	189.387	211.913	265.263	293.855	8.19945	8.19893	8.13788	8.168	8.2314	8.26161
165	999	A	1	3	71	73	Caribbean	12.75°N	78.73°W	-2827	G. ruber ss (white)	recalculated from Chalk et al., 2017	89.11	20.68	0.2	3.76	4.36	25.9	0.75	35	1.5	0.00235	0.000175	39.6	0.1	262.157	257.77	211.214	235.35	289.981	317.735	8.17023	8.17123	8.11309	8.14155	8.19878	8.22811
165	999	A	1	3	111	113	Caribbean	12.75°N	78.73°W	-2827	G. ruber ss (white)	recalculated from Chalk et al., 2017	100.36	20.58	0.24	3.73	4.33	25.76	0.75	35	1.5	0.00235	0.000175	39.6	0.1	272.37	270.569	217.712	243.201	302.303	334.227	8.15864	8.1593	8.09744	8.12728	8.18992	8.21926
165	999	A	1	3	132	134	Caribbean	12.75°N	78.73°W	-2827	G. ruber ss (white)	recalculated from Chalk et al., 2017	106.12	20.76	0.22	3.61	4.21	25.55	0.75	35	1.5	0.00235	0.000175	39.6	0.1	249.882	251.263	200.31	222.985	276.501	304.643	8.18541	8.18282	8.12639	8.15515	8.21566	8.24385
165	999	A	1	4	1	3	Caribbean	12.75°N	78.73°W	-2827	G. ruber ss (white)	recalculated from Chalk et al., 2017	111.32	20.38	0.11	3.65	4.25	25.07	0.75	35	1.5	0.00235	0.000175	39.6	0.1	290.676	288.057	240.455	263.836	317.472	345.634	8.13853	8.13448	8.08838	8.11328	8.16424	8.19011
165	999	A	1	4	22	24	Caribbean	12.75°N	78.73°W	-2827	G. ruber ss (white)	recalculated from Chalk et al., 2017	116.82	20.26	0.3	3.55	4.15	24.58	0.75	35	1.5	0.00235	0.000175	39.6	0.1	302.503	296.957	238.61	267.713	337.832	377.734	8.12674	8.12602	8.05837	8.0914	8.16156	8.19464
165	999	A	1	4	30	32	Caribbean	12.75°N	78.73°W	-2827	G. ruber ss (white)	recalculated from Chalk et al., 2017	118.81	20.18	0.3	3.75	4.35	25.17	0.75	35	1.5	0.00235	0.000175	39.6	0.1	320.525	319.757	252.951	282.862	357.869	401.271	8.10793	8.10858	8.03694	8.07265	8.14334	8.17646
165	999	A	1	4	32	34	Caribbean	12.75°N	78.73°W	-2827	G. ruber ss (white)	recalculated from Chalk et al., 2017	119.06	20.31	0.14	4.1	4.7	26.46	0.75	35	1.5	0.00235	0.000175	39.6	0.1	313.27	307.765	257.85	284.175	342.757	373.744	8.11242	8.11026	8.05902	8.08556	8.13894	8.16723
165	999	A	1	4	42	44	Caribbean	12.75°N	78.73°W	-2827	G. ruber ss (white)	recalculated from Chalk et al., 2017	121.79	20.12	0.2	3.81	4.41	25.26	0.75	35	1.5	0.00235	0.000175	39.6	0.1	328.875	324.555	268.768	296.169	361.715	398.187	8.09829	8.09987	8.03897	8.06867	8.12796	8.15661
165	999	A	1	4	51	53	Caribbean	12.75°N	78.73°W	-2827	G. ruber ss (white)	recalculated from Chalk et al., 2017	123.77	20.75	0.2	4.22	4.82	27.57	0.75	35	1.5	0.00235	0.000175	39.6	0.1	268.049	262.099	216.829	240.684	295.58	325.532	8.16083	8.16004	8.10261	8.13204	8.18995	8.21918
165	999	A	1	4	52	54	Caribbean	12.75°N	78.73°W	-2827	G. ruber ss (white)	recalculated from Chalk et al., 2017	124.37	20.55	0.09	4.59	5.19	28.27	0.75	35	1.5	0.00235	0.000175	39.6	0.1	298.535	295.153	247.464	271.031	326.175	355.036	8.12548	8.12804	8.07574	8.10003	8.15069	8.17627
165	999	A	1	4	62	64	Caribbean	12.75°N	78.73°W	-2827	G. ruber ss (white)	recalculated from Chalk et al., 2017	127.48	20.67	0.11	4.78	5.38	28.88	0.75	35	1.5	0.00235	0.000175	39.6	0.1	288.996	284.034	238.832	261.762	315.897	343.926	8.135	8.13515	8.08431	8.10942	8.16111	8.18645
165	999	A	1	4	71	73	Caribbean	12.75°N	78.73°W	-2827	G. ruber ss (white)	recalculated from Chalk et al., 2017	130.86	20.67	0.3	4.49	5.09	28	0.75	35	1.5	0.00235	0.000175	39.6	0.1	281.977	274.079	221.484	248.94	314.454	350.022	8.14484	8.13735	8.07799	8.11005	8.17901	8.21044
165	999	A	1	4	76	78	Caribbean	12.75°N	78.73°W	-2827	G. ruber ss (white)	recalculated from Chalk et al., 2017	131.91	20.88	0.11	4.67	5.27	28.75	0.75	35	1.5	0.00235	0.000175	39.6	0.1	263.029	263.66	215.52	237.879	288.531	313.94	8.16436	8.16222	8.11446	8.13789	8.19042	8.21675
165	999	A	1	4	81	83	Caribbean	12.75°N	78.73°W	-2827	G. ruber ss (white)	recalculated from Chalk et al., 2017	133.22	20.92	0.11	4.27	4.87	27.66	0.75	35	1.5	0.00235	0.000175	39.6	0.1	249.804	248.496	205.379	225.623	273.838	299.1	8.18217	8.17957	8.13111	8.15613	8.20808	8.23482
165	999	A	1	4	84	86	Caribbean	12.75°N	78.73°W	-2827	G. ruber ss (white)	recalculated from Chalk et al., 2017	134	21.24	0.12	4.34	4.94	28.36	0.75	35	1.5	0.00235	0.000175	39.6	0.1	222.95	218.776	180.957	200.571	245.138	268.134	8.21566	8.21238	8.16469	8.18881	8.24248	8.26969
165	999	A	1	4	90	92	Caribbean	12.75°N	78.73°W	-2827	G. ruber ss (white)	recalculated from Chalk et al., 2017	135.57	21.18	0.12	4.03	4.63	27.34	0.75	35	1.5	0.00235	0.000175	39.6	0.1	221.076	218.594	179.738	198.945	243.222	266.182	8.21977	8.22026	8.16827	8.19316	8.24628	8.27305
165	999	A	1	4	103	105	Caribbean	12.75°N	78.73°W	-2827	G. ruber ss (white)	recalculated from Chalk et al., 2017	138.97	21.19	0.11	4.04	4.64	27.37	0.75	35	1.5	0.00235	0.000175	39.6	0.1	220.299	216.912	178.815	197.986	242.333	265.416	8.22061	8.22166	8.16791	8.19394	8.24728	8.2739
165	999	A	1	4	132	134	Caribbean	12.75°N	78.73°W	-2827	G. ruber ss (white)	recalculated from Chalk et al., 2017	146.69	21.11	0.12	4.11	4.71	27.54	0.75	35	1.5	0.00235	0.000175	39.6	0.1	229.505	226.639	187.742	206.845	252.252	275.602	8.20827	8.21066	8.15774	8.1821	8.23483	8.26155
165	999	A	1	4	142	144	Caribbean	12.75°N	78.73°W	-2827	G. ruber ss (white)	recalculated from Chalk et al., 2017	150.04	21.22	0.11	4.19	4.79	27.94	0.75	35	1.5	0.00235	0.000175	39.6	0.1	221.463	216.459	180.471	199.152	243.442	266.616	8.21811	8.21802	8.16594	8.19159	8.24484	8.27185
165	999	A	1	5	51	53	Caribbean	12.75°N	78.73°W	-2827	G. ruber ss (white)	recalculated from Chalk et al., 2017	169.76	21.22	0.11	4.21	4.81	28.1	0.75	35	1.5	0.00235	0.000175	39.6	0.1	222.883	217.92	181.465	200.453	245.056	268.301	8.21582	8.21556	8.16368	8.18917	8.24254	8.26961
165	999	A	1	5	91	93	Caribbean	12.75°N	78.73°W	-2827	G. ruber ss (white)	recalculated from Chalk et al., 2017	179.94	21.17	0.11	3.87	4.47	26.97	0.75	35	1.5	0.00235	0.000175	39.6	0.1	219.68	213.992	178.058	198.11	241.601	263.949	8.22255	8.22066	8.17102	8.19611	8.24887	8.27511
165	999	A	1	6	12	14	Caribbean	12.75°N	78.73°W	-2827	G. ruber ss (white)	recalculated from Chalk et al., 2017	184.37	21.06	0.12	3.84	4.44	26.68	0.75	35	1.5	0.00235	0.000175	39.6	0.1	227.887	226.084	185.536	205.435	250.242	273.101	8.21152	8.21059	8.15917	8.18506	8.23809	8.26566
165	999	A	1	6	33	35	Caribbean	12.75°N	78.73°W	-2827	G. ruber ss (white)	recalculated from Chalk et al., 2017	190.01	20.95	0.1	3.84	4.44	26.6	0.75	35	1.5	0.00235	0.000175	39.6	0.1	238.033	236.833	195.938	215.657	260.32	285.043	8.19849	8.19653	8.14784	8.17286	8.22411	8.24941
165	999	A	1	6	39	41	Caribbean	12.75°N	78.73°W	-2827	G. ruber ss (white)	recalculated from Chalk et al., 2017	191.68	20.86	0.11	3.47	4.07	25.25	0.75	35	1.5	0.00235	0.000175	39.6	0.1	237.115	235.22	194.919	214.308	259.787	283.674	8.20221	8.20475	8.15132	8.17597	8.22831	8.25268
165	999	A	1	CC	7	9	Caribbean	12.75°N	78.73°W	-2827	G. ruber ss (white)	recalculated from Chalk et al., 2017	198.07	20.56	0.1	3.26	3.86	24.09	0.75	35	1.5	0.00235	0.000175	39.6	0.1	260.003	255.784	214.789	235.708	284.03	309.874	8.17507	8.17474	8.12519	8.14947	8.20077	8.22621
165	999	A	2	1	39	40	Caribbean	12.75°N	78.73°W	-2827	G. ruber ss (white)	recalculated from Chalk et al., 2017	211.57	20.36	0.12	3.51	4.11	24.67	0.75	35	1.5	0.00235	0.000175	39.6	0.1	289.401	286.926	240.496	262.799	316.253	343.839	8.1402	8.13964	8.08848	8.11434	8.1659	8.19044
165	999	A	2	1	59	61	Caribbean	12.75°N	78.73°W	-2827	G. ruber ss (white)	recalculated from Chalk et al., 2017	220.44	20.67	0.1	4.24	4.84	27.34	0.75	35	1.5	0.00235	0.000175	39.6	0.1	275.128	273.078	226.956	249.59	300.786	328.037	8.15249	8.1549	8.10234	8.12644	8.17829	8.20363
165	999	A	2	1	69	71	Caribbean	12.75°N	78.73°W	-2827	G. ruber ss (white)	recalculated from Chalk et al., 2017	223.66	20.67	0.13	4.19	4.79	27.16	0.75	35	1.5	0.00235	0.000175	39.6	0.1	273.579	269.788	224.491	247.508	299.833	325.478	8.15481	8.15329	8.10411	8.12871	8.18076	8.20705
165	999	A	2	1	91	93	Caribbean	12.75°N	78.73°W	-2827	G. ruber ss (white)	recalculated from Chalk et al., 2017	227.1	20.82	0.12	3.71	4.31	25.93	0.75	35	1.5	0.00235	0.000175	39.6	0.1	246.512	244.876	203.014	222.907	270.055	294.827	8.18901	8.18917	8.13829	8.16295	8.21493	8.24052
165	999	A	2	1	111	113	Caribbean	12.75°N	78.73°W	-2827	G. ruber ss (white)	recalculated from Chalk et al., 2017	235.76	20.47	0.12	3.41	4.01	24.47	0.75	35	1.5	0.00235	0.000175	39.6	0.1	274.121	274.327	226.701	248.303	299.822	326.414	8.15804	8.15795	8.10529	8.13178	8.18399	8.2093
165	999	A	2	1	123	125	Caribbean	12.75°N	78.73°W	-2827	G. ruber ss (white)	recalculated from Chalk et al., 2017	239.48	20.7	0.11	3.6	4.2	25.48	0.75	35	1.5	0.00235	0.000175	39.6	0.1	255.626	257.702	210.012	230.739	279.73	304.886	8.17829	8.17871	8.12774	8.15245	8.2042	8.23005
165	999	A	2	1	139	141	Caribbean	12.75°N	78.73°W	-2827	G. ruber ss (white)	recalculated from Chalk et al., 2017	242.9	20.44	0.13	3.84	4.44	25.76	0.75	35	1.5	0.00235	0.000175	39.6	0.1	289.757	288.934	238.684	262.385	316.882	346.103	8.13846	8.13964	8.08642	8.112	8.16517	8.19062
165	999	A	2	2	9	11	Caribbean	12.75°N	78.73°W	-2827	G. ruber ss (white)	recalculated from Chalk et al., 2017	247.18	20.59	0.11	3.89	4.49	26.08	0.75	35	1.5	0.00235	0.000175	39.6	0.1	273.894	276.668	226.835	248.224	299.388	326.255	8.15603	8.15634	8.1045	8.12996	8.18155	8.20841
165	999	A	2	2	23	24	Caribbean	12.75°N	78.73°W	-2827	G. ruber ss (white)	recalculated from Chalk et al., 2017	250.07	21	0.11	4.07	4.67	27.27	0.75	35	1.5	0.00235	0.000175	39.6	0.1	238.087	234.96	194.616	215.136	261.117	285.604	8.19717	8.19612	8.14681	8.17117	8.22274	8.25137
165	999	A	2	2	33	35	Caribbean	12.75°N	78.73°W	-2827	G. ruber ss (white)	This study	268.68	21.68	0.17	3.85	4.45	27.6	0.75	35	1.5	0.00235	0.000175	39.6	0.1	180.656	177.295	141.677	160.088	201.638	222.557	8.27886	8.27367	8.22167	8.24936	8.30843	8.33777
165	999	A	2	2	53	55	Caribbean	12.75°N	78.73°W	-2827	G. ruber ss (white)	This study	271.7	21.57	0.15	3.86	4.46	27.48	0.75	35	1.5	0.00235	0.000175	39.6	0.1	188.297	189.15	150.112	167.67	208.99	230.5	8.26667	8.26517	8.21126	8.238	8.29503	8.32316
165	999	A	2	2	63	65	Caribbean	12.75°N	78.73°W	-2827	G. ruber ss (white)	recalculated from Chalk et al., 2017	273.252	20.84	0.1	3.79	4.39	26.1	0.75	35	1.5	0.00235	0.000175	39.6	0.1	245.649	237.919	201.252	222.356	269.569	292.81	8.18964	8.19396	8.14042	8.16349	8.21498	8.24215
165	999	A	2	2	73	75	Caribbean	12.75°N	78.73°W	-2827	G. ruber ss (white)	This study	274.72	21.46	0.16	3.78	4.38	27.11	0.75	35	1.5	0.00235	0.000175	39.6	0.1	195.199	191.551	155.63	174.264	215.976	239.629	8.25714	8.25318	8.20157	8.22888	8.28613	8.31453
165	999	A	2	2	113	115	Caribbean	12.75°N	78.73°W	-2827	G. ruber ss (white)	This study	280.75	20.89	0.18	3.89	4.49	26.68	0.75	35	1.5	0.00235	0.000175	39.6	0.1	245.1	247.181	198.387	219.533	270.342	296.417	8.18952	8.18857	8.13442	8.16116	8.21817	8.24748
165	999	A	2	2	133	135	Caribbean	12.75°N	78.73°W	-2827	G. ruber ss (white)	This study	284.43	21.27	0.18	4	4.6	27.61	0.75	35	1.5	0.00235	0.000175	39.6	0.1	214.873	208.063	172.349	191.899	238.001	261.162	8.22791	8.22601	8.17131	8.19941	8.25642	8.28563
165	999	A	2	3	3	5	Caribbean	12.75°N	78.73°W	-2827	G. ruber ss (white)	This study	290.28	20.87	0.2	3.62	4.22	25.72	0.75	35	1.5	0.00235	0.000175	39.6	0.1	239.986	238.811	193.061	214.615	264.889	292.081	8.1979	8.20007	8.14099	8.16918	8.22724	8.2549
165	999	A	2	3	49	51	Caribbean	12.75°N	78.73°W	-2827	G. ruber ss (white)	This study	298.16	20.74	0.19	3.59	4.19	25.47	0.75	35	1.5	0.00235	0.000175	39.6	0.1	251.561	252.2	203.862	225.478	277.566	305.118	8.18357	8.18626	8.12748	8.15522	8.21213	8.24026
165	999	A	2	3	63	65	Caribbean	12.75°N	78.73°W	-2827	G. ruber ss (white)	This study	302.25	21	0.2	3.57	4.17	25.81	0.75	35	1.5	0.00235	0.000175	39.6	0.1	227.619	224.799	183.158	203.304	251.811	277.46	8.21364	8.21056	8.15691	8.18486	8.24267	8.27241
165	999	A	2	3	123	125	Caribbean	12.75°N	78.73°W	-2827	G. ruber ss (white)	This study	314.35	21.07	0.39	3.99	4.59	27.34	0.75	35	1.5	0.00235	0.000175	39.6	0.1	232.683	224.642	176.662	201.546	263.77	300.923	8.20557	8.21	8.12933	8.16754	8.24361	8.27969
165	999	A	2	4	13	15	Caribbean	12.75°N	78.73°W	-2827	G. ruber ss (white)	This study	322.37	20.57	0.24	3.88	4.48	26.26	0.75	35	1.5	0.00235	0.000175	39.6	0.1	277.937	275.31	223.305	247.852	307.517	340.875	8.15117	8.1487	8.08803	8.12048	8.18233	8.21311
165	999	A	2	4	53	55	Caribbean	12.75°N	78.73°W	-2827	G. ruber ss (white)	This study	332.78	20.65	0.19	4.38	4.98	27.76	0.75	35	1.5	0.00235	0.000175	39.6	0.1	281.24	276.094	228.176	252.288	309.887	340.631	8.14498	8.14228	8.08818	8.11646	8.17396	8.20263
165	999	A	2	4	93	95	Caribbean	12.75°N	78.73°W	-2827	G. ruber ss (white)	This study	342.05	21.2	0.21	4.07	4.67	27.54	0.75	35	1.5	0.00235	0.000175	39.6	0.1	220.811	214.895	176.504	196.561	245.223	271.401	8.22001	8.22036	8.1615	8.1906	8.24986	8.27812
165	999	A	2	4	133	135	Caribbean	12.75°N	78.73°W	-2827	G. ruber ss (white)	This study	351.99	21.23	0.18	3.87	4.47	27.02	0.75	35	1.5	0.00235	0.000175	39.6	0.1	214.663	214.436	171.688	191.56	237.609	262.017	8.22941	8.22978	8.17345	8.20085	8.25832	8.28697
165	999	A	2	5	23	25	Caribbean	12.75°N	78.73°W	-2827	G. ruber ss (white)	This study	361.78	21.29	0.14	4.12	4.72	27.93	0.75	35	1.5	0.00235	0.000175	39.6	0.1	215.194	216.207	173.562	192.99	237.341	260.136	8.22661	8.22714	8.17381	8.19927	8.25373	8.28274
165	999	A	2	5	63	65	Caribbean	12.75°N	78.73°W	-2827	G. ruber ss (white)	This study	376.69	20.51	0.22	3.91	4.51	26.1	0.75	35	1.5	0.00235	0.000175	39.6	0.1	284.102	282.547	229.235	253.947	314.327	345.765	8.14472	8.14418	8.0844	8.11384	8.17551	8.20434
165	999	A	2	5	103	105	Caribbean	12.75°N	78.73°W	-2827	G. ruber ss (white)	This study	392.32	20.34	0.21	3.71	4.31	25.27	0.75	35	1.5	0.00235	0.000175	39.6	0.1	298.764	297.375	241.841	267.698	329.735	363.05	8.12972	8.13525	8.07119	8.09971	8.15986	8.18848
165	999	A	2	5	143	145	Caribbean	12.75°N	78.73°W	-2827	G. ruber ss (white)	This study	402.5	20.57	0.16	4.49	5.09	28.06	0.75	35	1.5	0.00235	0.000175	39.6	0.1	293.753	289.883	241.038	265.653	322.519	352.533	8.13071	8.12856	8.07617	8.10324	8.15767	8.18513
165	999	A	2	6	33	35	Caribbean	12.75°N	78.73°W	-2827	G. ruber ss (white)	This study	410.88	20.14	0.26	3.9	4.5	25.54	0.75	35	1.5	0.00235	0.000175	39.6	0.1	329.291	326.031	263.9	293.162	365.312	405.816	8.09794	8.10249	8.03288	8.06458	8.13117	8.16195
165	999	A	2	6	73	75	Caribbean	12.75°N	78.73°W	-2827	G. ruber ss (white)	This study	419.26	20.64	0.22	4.11	4.71	26.95	0.75	35	1.5	0.00235	0.000175	39.6	0.1	275.76	272.977	222.016	247.064	304.326	337.888	8.15277	8.15656	8.09273	8.12302	8.18244	8.21248
144	871	B	1	2	3	5	West Pacific	5.55°N	172.35°E	-1255	G. ruber ss (white)	This study	160.46	21.52	0.18	3.898	4.76	28.32	0.75	35	1.5	0.002279	0.000175	39.6	0.1	200	199.733	160.068	178.808	221.194	244.002	8.25076	8.24609	8.19475	8.22156	8.27994	8.30935
144	871	B	1	2	9	11	West Pacific	5.55°N	172.35°E	-1255	G. ruber ss (white)	This study	167.97	21.77	0.19	3.791	4.66	28.46	0.75	35	1.5	0.002279	0.000175	39.6	0.1	181.452	179.286	143.753	161.398	201.253	222.675	8.2796	8.27971	8.22159	8.24962	8.30928	8.33909
144	871	B	1	2	15	17	West Pacific	5.55°N	172.35°E	-1255	G. ruber ss (white)	This study	172.98	21.35	0.22	3.754	4.62	27.72	0.75	35	1.5	0.002279	0.000175	39.6	0.1	209.953	208.7	167.017	187.11	232.577	258.815	8.23713	8.24329	8.17645	8.2069	8.26719	8.29758
144	871	B	1	2	21	23	West Pacific	5.55°N	172.35°E	-1255	G. ruber ss (white)	This study	177.99	21.39	0.19	3.708	4.57	27.62	0.75	35	1.5	0.002279	0.000175	39.6	0.1	206.023	201.027	165.648	184.163	228.061	251.853	8.243	8.24183	8.18621	8.2141	8.27193	8.3012
144	871	B	1	2	27	29	West Pacific	5.55°N	172.35°E	-1255	G. ruber ss (white)	This study	183	21.48	0.19	3.9	4.77	28.33	0.75	35	1.5	0.002279	0.000175	39.6	0.1	202.949	196.781	162.387	181.31	224.289	248.262	8.24584	8.24556	8.18725	8.21721	8.27492	8.30381
144	871	B	1	2	33	35	West Pacific	5.55°N	172.35°E	-1255	G. ruber ss (white)	This study	188.01	21.59	0.19	3.725	4.59	28.01	0.75	35	1.5	0.002279	0.000175	39.6	0.1	192.417	190.173	153.777	171.161	213.364	235.012	8.2629	8.25506	8.20603	8.23303	8.29218	8.3216
144	871	B	1	2	39	41	West Pacific	5.55°N	172.35°E	-1255	G. ruber ss (white)	This study	193.01	21.14	0.2	3.555	4.42	26.85	0.75	35	1.5	0.002279	0.000175	39.6	0.1	222.925	222.075	180.287	199.702	246.196	271.151	8.21994	8.22389	8.16263	8.19072	8.24914	8.27749
144	871	B	1	2	45	47	West Pacific	5.55°N	172.35°E	-1255	G. ruber ss (white)	This study	198.02	21.11	0.18	3.813	4.68	27.69	0.75	35	1.5	0.002279	0.000175	39.6	0.1	231.545	233.898	187.777	208.102	254.958	280.552	8.20657	8.20603	8.15101	8.17832	8.23505	8.2623
144	871	B	1	2	51	53	West Pacific	5.55°N	172.35°E	-1255	G. ruber ss (white)	This study	203.03	20.86	0.21	4.01	4.88	27.82	0.75	35	1.5	0.002279	0.000175	39.6	0.1	257.902	253.568	207.626	231.299	284.615	311.598	8.17246	8.17263	8.11471	8.14269	8.20195	8.23132
144	871	B	1	2	57	59	West Pacific	5.55°N	172.35°E	-1255	G. ruber ss (white)	This study	208.03	20.62	0.18	4.247	5.11	28.14	0.75	35	1.5	0.002279	0.000175	39.6	0.1	287.313	282.343	234.619	259.487	315.187	346.066	8.1367	8.13651	8.08125	8.10877	8.16475	8.19354
144	871	B	1	2	63	65	West Pacific	5.55°N	172.35°E	-1255	G. ruber ss (white)	This study	213.04	20.77	0.19	4.082	4.95	27.95	0.75	35	1.5	0.002279	0.000175	39.6	0.1	268.878	268.408	219.69	242.244	295.526	325.01	8.15882	8.1609	8.10219	8.13026	8.18705	8.21529
144	871	B	1	2	69	71	West Pacific	5.55°N	172.35°E	-1255	G. ruber ss (white)	This study	219.47	20.45	0.18	4.371	5.24	28.13	0.75	35	1.5	0.002279	0.000175	39.6	0.1	309.4	305.514	254.2	279.314	339.563	371.101	8.11295	8.11184	8.05718	8.08454	8.14101	8.16907
144	871	B	1	2	75	77	West Pacific	5.55°N	172.35°E	-1255	G. ruber ss (white)	This study	223.06	20.97	0.19	4.218	5.08	28.44	0.75	35	1.5	0.002279	0.000175	39.6	0.1	251.011	247	203.64	225.696	276.614	303.29	8.17985	8.1855	8.12259	8.15071	8.20836	8.23737
144	871	B	1	2	81	83	West Pacific	5.55°N	172.35°E	-1255	G. ruber ss (white)	This study	228.07	20.91	0.17	3.897	4.76	27.47	0.75	35	1.5	0.002279	0.000175	39.6	0.1	249.561	250.226	203.524	224.463	274.558	301.167	8.18341	8.17863	8.1296	8.15569	8.21146	8.23888
144	871	B	1	2	87	89	West Pacific	5.55°N	172.35°E	-1255	G. ruber ss (white)	This study	233.44	21	0.17	3.677	4.54	27.02	0.75	35	1.5	0.002279	0.000175	39.6	0.1	237.596	235.545	193.717	213.885	261.074	286.083	8.20006	8.1994	8.14419	8.17223	8.22799	8.25667
144	871	B	1	2	93	95	West Pacific	5.55°N	172.35°E	-1255	G. ruber ss (white)	This study	238.89	20.64	0.17	3.821	4.69	26.91	0.75	35	1.5	0.002279	0.000175	39.6	0.1	274.99	277.632	225.773	248.309	301.571	329.928	8.1535	8.16101	8.09944	8.12558	8.18137	8.20807
144	871	B	1	2	99	101	West Pacific	5.55°N	172.35°E	-1255	G. ruber ss (white)	This study	244.29	21.11	0.47	3.765	4.63	27.39	0.75	35	1.5	0.002279	0.000175	39.6	0.1	230.36	222.184	169.955	196.911	263.27	302.336	8.21013	8.21861	8.12335	8.16753	8.25338	8.29485
144	871	B	1	2	111	113	West Pacific	5.55°N	172.35°E	-1255	G. ruber ss (white)	This study	254.73	20.88	0.18	3.706	4.57	26.75	0.75	35	1.5	0.002279	0.000175	39.6	0.1	247.082	245.839	201.974	222.428	271.205	298.148	8.18755	8.18247	8.13194	8.15941	8.21597	8.24347
144	871	B	1	2	117	119	West Pacific	5.55°N	172.35°E	-1255	G. ruber ss (white)	This study	259.95	21.74	0.21	3.697	4.56	28.03	0.75	35	1.5	0.002279	0.000175	39.6	0.1	181.272	177.944	143.347	160.797	201.843	224.388	8.28088	8.27917	8.22196	8.25021	8.31119	8.3426
144	871	B	1	2	123	125	West Pacific	5.55°N	172.35°E	-1255	G. ruber ss (white)	This study	265.16	21.08	0.19	3.815	4.68	27.43	0.75	35	1.5	0.002279	0.000175	39.6	0.1	232.6	224.623	188.454	208.705	256.407	281.55	8.20559	8.20381	8.15006	8.17677	8.23451	8.26372
144	871	B	1	2	129	131	West Pacific	5.55°N	172.35°E	-1255	G. ruber ss (white)	This study	270.39	21.09	0.17	3.795	4.66	27.34	0.75	35	1.5	0.002279	0.000175	39.6	0.1	230.337	226.052	187.729	206.795	253.686	278.133	8.20858	8.20298	8.15315	8.18067	8.23735	8.26567
144	871	B	1	2	135	137	West Pacific	5.55°N	172.35°E	-1255	G. ruber ss (white)	This study	275.61	21.45	0.2	3.882	4.75	28.3	0.75	35	1.5	0.002279	0.000175	39.6	0.1	205.531	204.21	165.094	183.632	227.349	249.926	8.24243	8.24142	8.18536	8.21283	8.27183	8.30205
144	871	B	1	2	141	143	West Pacific	5.55°N	172.35°E	-1255	G. ruber ss (white)	This study	280.82	20.99	0.19	3.506	4.37	26.44	0.75	35	1.5	0.002279	0.000175	39.6	0.1	233.939	232.546	188.426	210.27	258.171	282.066	8.20539	8.20152	8.14899	8.17648	8.23413	8.26234
144	871	B	1	2	146	148	West Pacific	5.55°N	172.35°E	-1255	G. ruber ss (white)	This study	286.05	20.97	0.24	3.884	4.75	27.57	0.75	35	1.5	0.002279	0.000175	39.6	0.1	244.38	238.671	195.46	218.02	270.631	298.756	8.18975	8.19117	8.12917	8.15848	8.22036	8.25269
144	871	B	1	3	4	6	West Pacific	5.55°N	172.35°E	-1255	G. ruber ss (white)	This study	292.13	20.68	0.19	4.044	4.91	27.57	0.75	35	1.5	0.002279	0.000175	39.6	0.1	275.497	268.276	224.408	247.955	303.425	333.302	8.15158	8.15292	8.09395	8.12301	8.18039	8.20845
144	871	B	1	3	10	12	West Pacific	5.55°N	172.35°E	-1255	G. ruber ss (white)	This study	297.35	20.5	0.2	3.642	4.51	26.08	0.75	35	1.5	0.002279	0.000175	39.6	0.1	284.461	278.99	232.192	256.193	312.873	342.755	8.14371	8.14228	8.08603	8.11464	8.17241	8.20212
144	871	B	1	3	16	18	West Pacific	5.55°N	172.35°E	-1255	G. ruber ss (white)	This study	302.57	21.2	0.2	3.679	4.55	27.37	0.75	35	1.5	0.002279	0.000175	39.6	0.1	220.774	218.62	177.223	197.556	243.855	268.383	8.22206	8.21966	8.1654	8.19263	8.2513	8.28097
144	871	B	1	3	22	24	West Pacific	5.55°N	172.35°E	-1255	G. ruber ss (white)	This study	307.79	20.94	0.19	4.058	4.92	28.08	0.75	35	1.5	0.002279	0.000175	39.6	0.1	251.538	251.049	204.544	225.684	277.243	304.975	8.17986	8.1767	8.12381	8.15139	8.20901	8.23699
144	871	B	1	3	28	30	West Pacific	5.55°N	172.35°E	-1255	G. ruber ss (white)	This study	313.01	20.56	0.21	4.18	5.05	27.86	0.75	35	1.5	0.002279	0.000175	39.6	0.1	292.881	285.234	239.645	263.513	322.342	355.442	8.13151	8.13463	8.07327	8.1023	8.161	8.1893
144	871	B	1	3	34	36	West Pacific	5.55°N	172.35°E	-1255	G. ruber ss (white)	This study	318.23	20.98	0.2	4.209	5.08	28.67	0.75	35	1.5	0.002279	0.000175	39.6	0.1	251.961	248.861	204.684	225.989	278.274	304.994	8.17831	8.17685	8.12073	8.14952	8.20719	8.23593
144	871	B	1	3	40	42	West Pacific	5.55°N	172.35°E	-1255	G. ruber ss (white)	This study	323.03	20.71	0.25	4.154	5.02	28.08	0.75	35	1.5	0.002279	0.000175	39.6	0.1	276.691	273.035	222.403	246.535	306.573	340.076	8.1495	8.15368	8.08643	8.11835	8.18086	8.21181
144	871	B	1	3	46	48	West Pacific	5.55°N	172.35°E	-1255	G. ruber ss (white)	This study	326.8	21.05	0.18	4.605	5.47	29.81	0.75	35	1.5	0.002279	0.000175	39.6	0.1	252.873	252.146	204.869	227.22	278.762	304.403	8.1749	8.1738	8.11992	8.14584	8.20356	8.23167
144	871	B	1	3	52	54	West Pacific	5.55°N	172.35°E	-1255	G. ruber ss (white)	This study	330.57	20.26	0.17	4.809	5.68	29.04	0.75	35	1.5	0.002279	0.000175	39.6	0.1	345.41	343.041	284.141	312.248	378.723	413.321	8.07558	8.07247	8.01918	8.04725	8.1039	8.1312
144	871	B	1	3	58	60	West Pacific	5.55°N	172.35°E	-1255	G. ruber ss (white)	This study	334.34	20.65	0.19	3.928	4.79	27.17	0.75	35	1.5	0.002279	0.000175	39.6	0.1	276.017	269.266	224.891	248.869	303.156	331.976	8.15167	8.15538	8.09421	8.12324	8.18055	8.20836
144	871	B	1	3	64	66	West Pacific	5.55°N	172.35°E	-1255	G. ruber ss (white)	This study	339.25	20.61	0.19	3.764	4.63	26.5	0.75	35	1.5	0.002279	0.000175	39.6	0.1	274.645	272.653	223.651	247.218	302.144	331.261	8.15389	8.15726	8.09689	8.12504	8.18271	8.21094
144	871	B	1	3	70	72	West Pacific	5.55°N	172.35°E	-1255	G. ruber ss (white)	This study	345.66	21.39	0.2	3.885	4.75	28.02	0.75	35	1.5	0.002279	0.000175	39.6	0.1	208.728	205.596	167.495	186.696	230.906	255.125	8.23819	8.23406	8.17924	8.20898	8.26776	8.29712
144	871	B	1	3	76	78	West Pacific	5.55°N	172.35°E	-1255	G. ruber ss (white)	This study	352.06	21.18	0.19	3.821	4.69	27.61	0.75	35	1.5	0.002279	0.000175	39.6	0.1	224.549	223.631	182.039	201.022	247.949	273.764	8.21638	8.2165	8.16053	8.18732	8.24545	8.27518
144	871	B	1	3	82	84	West Pacific	5.55°N	172.35°E	-1255	G. ruber ss (white)	This study	358.48	21.13	0.18	3.915	4.78	27.76	0.75	35	1.5	0.002279	0.000175	39.6	0.1	230.112	228.559	186.001	206.483	253.899	278.105	8.20839	8.20942	8.15273	8.17885	8.23746	8.26495
144	871	B	1	3	88	90	West Pacific	5.55°N	172.35°E	-1255	G. ruber ss (white)	This study	364.88	21.62	0.18	3.608	4.47	27.66	0.75	35	1.5	0.002279	0.000175	39.6	0.1	188.139	185.896	150.323	167.576	208.487	230.156	8.27071	8.26785	8.21247	8.24151	8.29995	8.32933
144	871	B	1	3	94	96	West Pacific	5.55°N	172.35°E	-1255	G. ruber ss (white)	This study	371.29	21.04	0.26	3.606	4.47	26.84	0.75	35	1.5	0.002279	0.000175	39.6	0.1	232.415	230.005	184.291	206.375	257.821	287.019	8.20719	8.20095	8.14318	8.17574	8.23903	8.2715
144	871	B	1	3	100	102	West Pacific	5.55°N	172.35°E	-1255	G. ruber ss (white)	This study	377.7	20.69	0.19	3.68	4.55	26.48	0.75	35	1.5	0.002279	0.000175	39.6	0.1	265.978	261.771	217.069	239.322	292.569	321.536	8.16477	8.16388	8.10865	8.13591	8.19332	8.22165
144	871	B	1	3	106	108	West Pacific	5.55°N	172.35°E	-1255	G. ruber ss (white)	This study	384.11	20.7	0.17	3.841	4.71	27.09	0.75	35	1.5	0.002279	0.000175	39.6	0.1	269.376	265.615	220.594	243.434	295.083	324.902	8.15952	8.15794	8.10446	8.13191	8.18747	8.21577
144	871	B	1	3	112	114	West Pacific	5.55°N	172.35°E	-1255	G. ruber ss (white)	This study	390.51	20.49	0.22	4.023	4.89	27.26	0.75	35	1.5	0.002279	0.000175	39.6	0.1	296.222	288.396	240.893	265.102	326.948	360.71	8.12843	8.12895	8.06863	8.09786	8.15874	8.1879
144	871	B	1	3	118	120	West Pacific	5.55°N	172.35°E	-1255	G. ruber ss (white)	This study	396.93	20.81	0.2	4.255	5.12	28.55	0.75	35	1.5	0.002279	0.000175	39.6	0.1	269.34	268.05	219.298	241.869	296.492	325.904	8.15692	8.15541	8.09888	8.1279	8.18587	8.21515
144	871	B	1	3	124	126	West Pacific	5.55°N	172.35°E	-1255	G. ruber ss (white)	This study	402.45	20.78	0.18	4.678	5.54	29.58	0.75	35	1.5	0.002279	0.000175	39.6	0.1	280.877	276.164	229.875	253.142	308.717	337.885	8.14214	8.14529	8.08724	8.11399	8.17014	8.19823
144	871	B	1	3	130	132	West Pacific	5.55°N	172.35°E	-1255	G. ruber ss (white)	This study	406.85	20.6	0.19	4.918	5.78	29.94	0.75	35	1.5	0.002279	0.000175	39.6	0.1	306.809	304.925	251.436	276.176	337.09	369.256	8.11302	8.11481	8.05553	8.08397	8.14164	8.16999
144	871	B	1	3	136	138	West Pacific	5.55°N	172.35°E	-1255	G. ruber ss (white)	This study	411.26	20.68	0.19	4.72	5.59	29.51	0.75	35	1.5	0.002279	0.000175	39.6	0.1	292.745	283.801	239.683	263.961	321.545	352.067	8.12882	8.12871	8.07298	8.10004	8.15729	8.18598
144	871	B	1	3	142	144	West Pacific	5.55°N	172.35°E	-1255	G. ruber ss (white)	This study	415.66	20.91	0.18	4.406	5.27	29.02	0.75	35	1.5	0.002279	0.000175	39.6	0.1	261.878	261.428	212.432	235.424	287.954	316.344	8.16546	8.1645	8.10946	8.1371	8.19344	8.22304
144	871	B	1	3	148	150	West Pacific	5.55°N	172.35°E	-1255	G. ruber ss (white)	This study	420.63	20.88	0.21	4.227	5.09	28.41	0.75	35	1.5	0.002279	0.000175	39.6	0.1	260.546	258.607	211.274	233.516	287.294	316.055	8.16812	8.16971	8.11075	8.13896	8.19724	8.22726
144	871	B	1	2	93	95	West Pacific	5.55°N	172.35°E	-1255	G. ruber sl	This study	238.89	20.99	0.187363	3.91	4.4547	26.7591	0.75	35	1.5	0.002279	0.000175	39.6	0.1	236.532	232.136	192.709	212.334	260.706	287.774	8.20141	8.19912	8.14401	8.17213	8.23061	8.25867
144	871	B	1	3	4	6	West Pacific	5.55°N	172.35°E	-1255	G. ruber sl	This study	292.13	20.69	0.14092	3.97	4.5051	26.3429	0.75	35	1.5	0.002279	0.000175	39.6	0.1	264.208	260.278	214.127	237.611	290.877	319.892	8.16643	8.1637	8.10735	8.13733	8.19533	8.22377
144	871	B	1	3	10	12	West Pacific	5.55°N	172.35°E	-1255	G. ruber sl	This study	297.35	20.67	0.172763	3.82	4.36479	25.8775	0.75	35	1.5	0.002279	0.000175	39.6	0.1	262.645	262.459	213.457	235.855	289.238	317.029	8.16949	8.16821	8.1124	8.1407	8.19863	8.22588
144	871	B	1	3	28	30	West Pacific	5.55°N	172.35°E	-1255	G. ruber sl	This study	313.01	20.63	0.172807	3.92	4.46007	26.2229	0.75	35	1.5	0.002279	0.000175	39.6	0.1	270.39	266.522	220.757	242.597	297.975	326.37	8.15961	8.15945	8.10276	8.13089	8.18815	8.21576

## Sheet: Table 2. MgCa calibrations
Supplementary Information Table 2. Mg/Ca and different methods to calculate temperature
Age		Age in thousands of years (ky).
Species		Globigerinoides ruber sensu stricto.
Mg/Ca		Mg/Ca ratio (mmol/mol).
Mg/Ca.corr		Mg/Ca ratio corrected for depth dependent dissolution (mmol/mol).
Temp.Gray18		Mg/Ca-derived temperature using the "temperature only" calibration of Gray et al., (2018).
Temp.GE19.pH.corr		Mg/Ca-derived temperature using the pH corrected approach of Gray and Evans (2019).
Temp.Gray18.depthcorr		Mg/Ca-derived (corrected for dissolution) temperature using the "temperature only" calibration of Gray et al., (2018).
Temp.GE19.depthcorr.pHcorr		Mg/Ca-derived (corrected for dissolution) temperature using the pH corrected approach of Gray and Evans (2019). This is the prefered approached used in the manuscript.
Temp.Anand		Mg/Ca-derived temperature using the calibration of Anand et al. (2003).
Temp.Anand.depthcorr		Mg/Ca-derived (corrected for dissolution) temperature using the calibration of Anand et al. (2003).
Temp.cst		Constant temperature of 26 °C.
ODP core site	Data set	Species	Age	Mg/Ca	Mg/Ca.corr	Temp.Gray18	Temp.GE19.pH.corr	Temp.Gray18.depthcorr	Temp.GE19.depthcorr.pHcorr	Temp.Anand	Temp.Anand.depthcorr	Temp.cst
999	recalculated from Chalk et al. (2017)	G. ruber ss	3.91	4.14	4.74	22.44	25.291	25.22	27.2	26.53	28.17	26
999	recalculated from Chalk et al. (2017)	G. ruber ss	4.63	4.25	4.85	22.94	25.829	25.67	27.72	26.84	28.44	26
999	recalculated from Chalk et al. (2017)	G. ruber ss	5.02	4.1	4.7	22.26	25.008	25.07	26.99	26.42	28.08	26
999	recalculated from Chalk et al. (2017)	G. ruber ss	7.82	4.15	4.75	22.49	25.511	25.26	27.44	26.55	28.19	26
999	recalculated from Chalk et al. (2017)	G. ruber ss	7.82	4.15	4.75	22.49	25.368	25.26	27.31	26.55	28.19	26
999	recalculated from Chalk et al. (2017)	G. ruber ss	9.49	3.88	4.48	21.22	24.308	24.2	26.37	25.83	27.57	26
999	recalculated from Chalk et al. (2017)	G. ruber ss	10.32	3.85	4.45	21.07	24.591	24.08	26.66	25.74	27.5	26
999	recalculated from Chalk et al. (2017)	G. ruber ss	11.65	3.67	4.27	20.17	23.541	23.3	25.69	25.2	27.04	26
999	recalculated from Chalk et al. (2017)	G. ruber ss	14.01	3.81	4.41	20.88	24.382	23.89	26.48	25.61	27.39	26
999	recalculated from Chalk et al. (2017)	G. ruber ss	15.07	3.82	4.42	20.93	24.443	23.93	26.51	25.64	27.41	26
999	recalculated from Chalk et al. (2017)	G. ruber ss	15.07	3.82	4.42	20.93	24.643	23.93	26.72	25.64	27.41	26
999	recalculated from Chalk et al. (2017)	G. ruber ss	17.26	3.54	4.14	19.49	23.332	22.7	25.57	24.79	26.69	26
999	recalculated from Chalk et al. (2017)	G. ruber ss	19.19	3.38	3.98	18.62	23.739	21.98	26.02	24.28	26.26	26
999	recalculated from Chalk et al. (2017)	G. ruber ss	21.12	3.28	3.88	18.05	22.533	21.49	24.87	23.93	25.97	26
999	recalculated from Chalk et al. (2017)	G. ruber ss	22.61	3.52	4.12	19.38	23.583	22.63	25.79	24.74	26.65	26
999	recalculated from Chalk et al. (2017)	G. ruber ss	24.38	3.43	4.03	18.9	23.586	22.22	25.86	24.45	26.4	26
999	recalculated from Chalk et al. (2017)	G. ruber ss	25.51	3.39	3.99	18.67	23.553	22.05	25.9	24.33	26.3	26
999	recalculated from Chalk et al. (2017)	G. ruber ss	25.51	3.39	3.99	18.67	23.65	22.05	25.99	24.33	26.3	26
999	recalculated from Chalk et al. (2017)	G. ruber ss	35.82	3.48	4.08	19.17	23.263	22.44	25.51	24.6	26.53	26
999	recalculated from Chalk et al. (2017)	G. ruber ss	46.61	3.43	4.03	18.9	23.205	22.21	25.48	24.44	26.4	26
999	recalculated from Chalk et al. (2017)	G. ruber ss	52.14	3.48	4.08	19.17	23.616	22.42	25.86	24.59	26.52	26
999	recalculated from Chalk et al. (2017)	G. ruber ss	61.28	3.57	4.17	19.65	23.958	22.84	26.17	24.88	26.77	26
999	recalculated from Chalk et al. (2017)	G. ruber ss	77.3	3.57	4.17	19.65	23.488	22.85	25.64	24.89	26.78	26
999	recalculated from Chalk et al. (2017)	G. ruber ss	84.33	3.58	4.18	19.7	23.497	22.9	25.7	24.92	26.8	26
999	recalculated from Chalk et al. (2017)	G. ruber ss	89.11	3.76	4.36	20.63	23.814	23.69	25.9	25.47	27.27	26
999	recalculated from Chalk et al. (2017)	G. ruber ss	100.36	3.73	4.33	20.48	23.656	23.55	25.76	25.37	27.18	26
999	recalculated from Chalk et al. (2017)	G. ruber ss	106.12	3.61	4.21	19.86	23.366	23.02	25.55	25.01	26.87	26
999	recalculated from Chalk et al. (2017)	G. ruber ss	111.32	3.65	4.25	20.07	22.924	23.21	25.07	25.14	26.99	26
999	recalculated from Chalk et al. (2017)	G. ruber ss	116.82	3.55	4.15	19.54	22.39	22.78	24.58	24.84	26.73	26
999	recalculated from Chalk et al. (2017)	G. ruber ss	118.81	3.75	4.35	20.58	23.047	23.64	25.17	25.44	27.24	26
999	recalculated from Chalk et al. (2017)	G. ruber ss	119.06	4.1	4.7	22.26	24.572	25.08	26.46	26.43	28.09	26
999	recalculated from Chalk et al. (2017)	G. ruber ss	121.79	3.81	4.41	20.88	23.213	23.88	25.26	25.61	27.38	26
999	recalculated from Chalk et al. (2017)	G. ruber ss	123.77	4.22	4.82	22.81	25.69	25.56	27.57	26.76	28.37	26
999	recalculated from Chalk et al. (2017)	G. ruber ss	124.37	4.59	5.19	24.39	26.521	26.93	28.27	27.69	29.18	26
999	recalculated from Chalk et al. (2017)	G. ruber ss	127.48	4.78	5.38	25.16	27.211	27.6	28.88	28.14	29.57	26
999	recalculated from Chalk et al. (2017)	G. ruber ss	130.86	4.49	5.09	23.98	26.197	26.55	28	27.43	28.95	26
999	recalculated from Chalk et al. (2017)	G. ruber ss	131.91	4.67	5.27	24.72	27.042	27.21	28.75	27.87	29.34	26
999	recalculated from Chalk et al. (2017)	G. ruber ss	133.22	4.27	4.87	23.03	25.801	25.73	27.66	26.88	28.47	26
999	recalculated from Chalk et al. (2017)	G. ruber ss	134	4.34	4.94	23.34	26.503	26	28.36	27.06	28.63	26
999	recalculated from Chalk et al. (2017)	G. ruber ss	135.57	4.03	4.63	21.94	25.344	24.8	27.34	26.24	27.92	26
999	recalculated from Chalk et al. (2017)	G. ruber ss	138.97	4.04	4.64	21.98	25.418	24.84	27.37	26.27	27.95	26
999	recalculated from Chalk et al. (2017)	G. ruber ss	146.69	4.11	4.71	22.31	25.613	25.12	27.54	26.46	28.11	26
999	recalculated from Chalk et al. (2017)	G. ruber ss	150.04	4.19	4.79	22.67	26.062	25.44	27.94	26.68	28.3	26
999	recalculated from Chalk et al. (2017)	G. ruber ss	169.76	4.21	4.81	22.76	26.208	25.51	28.1	26.72	28.34	26
999	recalculated from Chalk et al. (2017)	G. ruber ss	179.94	3.87	4.47	21.17	24.916	24.13	26.97	25.78	27.53	26
999	recalculated from Chalk et al. (2017)	G. ruber ss	184.37	3.84	4.44	21.03	24.624	24.02	26.68	25.7	27.47	26
999	recalculated from Chalk et al. (2017)	G. ruber ss	190.01	3.84	4.44	21.03	24.521	24	26.6	25.69	27.45	26
999	recalculated from Chalk et al. (2017)	G. ruber ss	191.68	3.47	4.07	19.11	23.002	22.38	25.25	24.56	26.5	26
999	recalculated from Chalk et al. (2017)	G. ruber ss	198.07	3.26	3.86	17.94	21.72	21.4	24.09	23.87	25.92	26
999	recalculated from Chalk et al. (2017)	G. ruber ss	211.57	3.51	4.11	19.33	22.433	22.58	24.67	24.7	26.61	26
999	recalculated from Chalk et al. (2017)	G. ruber ss	220.44	4.24	4.84	22.9	25.495	25.64	27.34	26.81	28.42	26
999	recalculated from Chalk et al. (2017)	G. ruber ss	223.66	4.19	4.79	22.67	25.268	25.43	27.16	26.67	28.29	26
999	recalculated from Chalk et al. (2017)	G. ruber ss	227.1	3.71	4.31	20.38	23.792	23.45	25.93	25.31	27.13	26
999	recalculated from Chalk et al. (2017)	G. ruber ss	235.76	3.41	4.01	18.78	22.184	22.12	24.47	24.38	26.34	26
999	recalculated from Chalk et al. (2017)	G. ruber ss	239.48	3.6	4.2	19.81	23.306	22.99	25.48	24.99	26.86	26
999	recalculated from Chalk et al. (2017)	G. ruber ss	242.9	3.84	4.44	21.03	23.704	24.03	25.76	25.71	27.47	26
999	recalculated from Chalk et al. (2017)	G. ruber ss	247.18	3.89	4.49	21.27	24.046	24.21	26.08	25.83	27.58	26
999	recalculated from Chalk et al. (2017)	G. ruber ss	250.07	4.07	4.67	22.12	25.293	24.97	27.27	26.36	28.02	26
999	recalculated from Chalk et al. (2017)	G. ruber ss	257.84	3.79	4.39	20.78	24.037	23.8	26.1	25.55	27.33	26
999	recalculated from Chalk et al. (2017)	G. ruber ss	268.68	3.85	4.45	21.07	25.526	23.81	27.6	25.73	27.49	26
999	This study	G. ruber ss	271.7	3.86	4.46	21.12	25.436	23.85	27.48	25.76	27.51	26
999	This study	G. ruber ss	274.72	3.78	4.38	20.73	25.041	23.51	27.11	25.53	27.31	26
999	This study	G. ruber ss	280.75	3.89	4.49	21.27	24.617	23.98	26.68	25.84	27.58	26
999	This study	G. ruber ss	284.43	4	4.6	21.8	25.639	24.43	27.61	26.15	27.85	26
999	This study	G. ruber ss	290.28	3.62	4.22	19.91	23.576	22.81	25.72	25.05	26.91	26
999	This study	G. ruber ss	298.16	3.59	4.19	19.76	23.25	22.67	25.47	24.97	26.84	26
999	This study	G. ruber ss	302.25	3.57	4.17	19.65	23.615	22.58	25.81	24.89	26.78	26
999	This study	G. ruber ss	314.35	3.99	4.59	21.75	25.352	24.39	27.34	26.13	27.83	26
999	This study	G. ruber ss	322.37	3.88	4.48	21.22	24.2	23.93	26.26	25.82	27.56	26
999	This study	G. ruber ss	332.78	4.38	4.98	23.51	25.894	25.93	27.76	27.16	28.72	26
999	This study	G. ruber ss	342.05	4.07	4.67	22.12	25.559	24.72	27.54	26.35	28.02	26
999	This study	G. ruber ss	351.99	3.87	4.47	21.17	24.949	23.89	27.02	25.79	27.54	26
999	This study	G. ruber ss	361.78	4.12	4.72	22.35	25.987	24.92	27.93	26.48	28.13	26
999	This study	G. ruber ss	376.69	3.91	4.51	21.37	24.113	24.06	26.1	25.9	27.64	26
999	This study	G. ruber ss	392.32	3.71	4.31	20.38	23.151	23.2	25.27	25.32	27.14	26
999	This study	G. ruber ss	402.5	4.49	5.09	23.98	26.318	26.34	28.06	27.44	28.96	26
999	This study	G. ruber ss	410.88	3.9	4.5	21.32	23.543	24.02	25.54	25.87	27.61	26
999	This study	G. ruber ss	419.26	4.11	4.71	22.31	25.025	24.88	26.95	26.46	28.11	26
871	This study	G. ruber ss	160.46	3.898	4.76	21.31	25.47	25.1	28.32	25.87	28.1	26
871	This study	G. ruber ss	167.97	3.791	4.66	20.78	25.54	24.67	28.46	25.56	27.84	26
871	This study	G. ruber ss	172.98	3.754	4.62	20.6	24.76	24.52	27.72	25.45	27.76	26
871	This study	G. ruber ss	177.99	3.708	4.57	20.37	24.66	24.33	27.62	25.31	27.64	26
871	This study	G. ruber ss	183	3.9	4.77	21.32	25.49	25.1	28.33	25.76	28.01	26
871	This study	G. ruber ss	188.01	3.725	4.59	20.45	25.04	24.4	28.01	25.36	27.69	26
871	This study	G. ruber ss	193.01	3.555	4.42	19.57	23.78	23.69	26.85	24.84	27.27	26
871	This study	G. ruber ss	198.02	3.813	4.68	20.89	24.78	24.76	27.69	25.62	27.9	26
871	This study	G. ruber ss	203.03	4.01	4.88	21.84	25.06	25.53	27.82	26.18	28.36	26
871	This study	G. ruber ss	208.03	4.247	5.11	22.93	25.51	26.43	28.14	26.82	28.88	26
871	This study	G. ruber ss	213.04	4.082	4.95	22.18	25.22	25.81	27.95	26.38	28.52	26
871	This study	G. ruber ss	219.47	4.371	5.24	23.47	25.54	26.88	28.13	27.14	29.15	26
871	This study	G. ruber ss	223.06	4.218	5.08	22.8	25.8	26.32	28.44	26.74	28.82	26
871	This study	G. ruber ss	228.07	3.897	4.76	21.3	24.62	25.09	27.47	25.86	28.09	26
871	This study	G. ruber ss	233.44	3.677	4.54	20.21	24.03	24.2	27.02	25.22	27.57	26
871	This study	G. ruber ss	238.89	3.821	4.69	20.93	24.04	24.79	26.91	25.65	27.92	26
871	This study	G. ruber ss	244.29	3.765	4.63	20.65	24.45	24.56	27.39	25.48	27.78	26
871	This study	G. ruber ss	254.73	3.706	4.57	20.36	23.81	24.32	26.75	25.31	27.64	26
871	This study	G. ruber ss	259.95	3.697	4.56	20.31	25.06	24.28	28.03	25.28	27.62	26
871	This study	G. ruber ss	265.16	3.815	4.68	20.9	24.55	24.76	27.43	25.63	27.9	26
871	This study	G. ruber ss	270.39	3.795	4.66	20.8	24.47	24.68	27.34	25.57	27.85	26
871	This study	G. ruber ss	275.61	3.882	4.75	21.23	25.38	25.03	28.3	25.82	28.06	26
871	This study	G. ruber ss	280.82	3.506	4.37	19.31	23.35	23.48	26.44	24.69	27.14	26
871	This study	G. ruber ss	286.05	3.884	4.75	21.24	24.76	25.04	27.57	25.83	28.06	26
871	This study	G. ruber ss	292.13	4.044	4.91	22	24.81	25.66	27.57	26.28	28.43	26
871	This study	G. ruber ss	297.35	3.642	4.51	20.03	23.08	24.05	26.08	25.11	27.48	26
871	This study	G. ruber ss	302.57	3.679	4.55	20.22	24.37	24.21	27.37	25.22	27.57	26
871	This study	G. ruber ss	307.79	4.058	4.92	22.07	25.36	25.72	28.08	26.31	28.46	26
871	This study	G. ruber ss	313.01	4.18	5.05	22.63	25.19	26.18	27.86	26.64	28.74	26
871	This study	G. ruber ss	318.23	4.209	5.08	22.76	25.96	26.29	28.67	26.72	28.8	26
871	This study	G. ruber ss	323.03	4.154	5.02	22.51	25.37	26.08	28.08	26.57	28.68	26
871	This study	G. ruber ss	326.8	4.605	5.47	24.45	27.35	27.71	29.81	27.72	29.63	26
871	This study	G. ruber ss	330.57	4.809	5.68	25.27	26.65	28.4	29.04	28.2	30.04	26
871	This study	G. ruber ss	334.34	3.928	4.79	21.45	24.37	25.21	27.17	25.95	28.17	26
871	This study	G. ruber ss	339.25	3.764	4.63	20.65	23.57	24.56	26.5	25.48	27.78	26
871	This study	G. ruber ss	345.66	3.885	4.75	21.25	25.18	25.04	28.02	25.83	28.07	26
871	This study	G. ruber ss	352.06	3.821	4.69	20.93	24.7	24.79	27.61	25.65	27.92	26
871	This study	G. ruber ss	358.48	3.915	4.78	21.39	24.95	25.16	27.76	25.92	28.14	26
871	This study	G. ruber ss	364.88	3.608	4.47	19.85	24.62	23.91	27.66	25.01	27.4	26
871	This study	G. ruber ss	371.29	3.606	4.47	19.84	23.76	23.9	26.84	25	27.39	26
871	This study	G. ruber ss	377.7	3.68	4.55	20.22	23.51	24.21	26.48	25.23	27.58	26
871	This study	G. ruber ss	384.11	3.841	4.71	21.03	24.17	24.87	27.09	25.7	27.96	26
871	This study	G. ruber ss	390.51	4.023	4.89	21.9	24.5	25.58	27.26	26.22	28.38	26
871	This study	G. ruber ss	396.93	4.255	5.12	22.96	25.88	26.46	28.55	26.84	28.9	26
871	This study	G. ruber ss	402.45	4.678	5.54	24.75	27.2	27.96	29.58	27.89	29.78	26
871	This study	G. ruber ss	406.85	4.918	5.78	25.69	27.62	28.76	29.94	28.45	30.25	26
871	This study	G. ruber ss	411.26	4.72	5.59	24.92	27.13	28.1	29.51	27.99	29.87	26
871	This study	G. ruber ss	415.66	4.406	5.27	23.62	26.46	27.01	29.02	27.23	29.22	26
871	This study	G. ruber ss	420.63	4.227	5.09	22.84	25.76	26.35	28.41	26.77	28.84	26

## Sheet: Table 3. CO2 sensitivity tests
Supplementary Information Table 3. d11B-derived pCO2 calculated with different treatments of Mg/Ca-derived temperature.
Age		Age in thousands of years (ky).
pCO2.max		pCO2 (in parts per million) calculated from d11B as the maximum probability of 10, 000 realisations of the Monte Carlo simulation, and calculated with different Mg/Ca-temperature calibrations.
Mg/Ca		Mg/Ca ratio (mmol/mol).
Mg/Ca (corr)		Mg/Ca ratio corrected for depth dependent dissolution (mmol/mol).
Temp.Gray18		Mg/Ca-derived temperature using the "temperature only" calibration of Gray et al., (2018).
Temp.GE19.pH.corr		Mg/Ca-derived temperature using the pH corrected approach of Gray and Evans (2019).
Temp.Gray18.depthcorr		Mg/Ca-derived (corrected for dissolution) temperature using the "temperature only" calibration of Gray et al., (2018).
Temp.GE19.depthcorr.pHcorr		Mg/Ca-derived (corrected for dissolution) temperature using the pH corrected approach of Gray and Evans (2019). This is the prefered approached used in the manuscript.
Temp.Anand		Mg/Ca-derived temperature using the calibration of Anand et al. (2003).
Temp.Anand.depthcorr		Mg/Ca-derived (corrected for dissolution) temperature using the calibration of Anand et al. (2003).
Temp.cst		Constant temperature of 26 °C.
ice core pCO2 interpolated		pCO2 (parts per million) from ice cores (Bereiter et al., 2015) interpolated from d11B age.
ODP core site	Age	pCO2.max							ice core pCO2 interpolated
		Temp.Gray18	Temp.GE19.pH.corr	Temp.Gray18.depthcorr	Temp.GE19.depthcorr.pHcorr	Temp.Anand	Temp.Anand.depthcorr	Temp.cst
999	3.91	238.22	257.11	251.28	268.84	263.72	282.66	257.63	273.03
999	4.63	226.19	245.59	244.42	262.39	252.01	270.79	250.97	270.29
999	5.02	244.23	261.19	257.67	280.05	275.15	291.69	264.65	268.73
999	7.82	215.39	241.45	232.21	253.56	248.16	265.36	242.78	260.91
999	7.82	227.9	247.5	248.03	264.56	264.67	277.29	253.81	260.91
999	9.49	219.44	243.78	246.87	261.16	262.5	276.37	253.59	260.03
999	10.32	199.28	223.28	221.65	240.24	230.08	247.84	228.65	256.98
999	11.65	211.56	230.5	237.39	249.69	249.02	267.2	251.14	252.07
999	14.01	189.68	215.41	216.36	233.09	227.9	241.56	225.24	236.94
999	15.07	187.79	212.95	211.37	230.54	222.61	237.43	223.85	229.2
999	15.07	183.93	198.23	199.77	215.88	211.05	224.8	212.46	229.2
999	17.26	174.65	207.83	201.44	219.57	214.49	230.07	221	208.19
999	19.19	128.64	153.05	145.35	164.99	152.17	168.19	165.99	192.92
999	21.12	157.49	187.04	176.1	198.57	190.56	207.13	200.79	189.81
999	22.61	161.47	187.54	183.74	201.65	194.04	209.39	199.49	188.57
999	24.38	141.95	164.51	160.11	181.33	175.85	186.77	178.35	187.15
999	25.51	138.28	161.58	151.36	173.76	163.85	177.88	171.58	187.3
999	25.51	132.36	155.34	147.28	169.49	159.06	172.49	168.54	187.3
999	35.82	169.17	195.67	190.45	212.86	204.88	221.19	217.79	202.43
999	46.61	167.11	191.59	185.46	210.15	196.42	216.55	208.94	211.31
999	52.14	157.09	184.54	177.77	198.2	192.93	205.87	197.91	214.88
999	61.28	156.66	182.63	174.99	197.22	193.66	206.11	193.5	211.37
999	77.3	190.93	216.9	215.13	236.22	233.34	246.3	237.89	234.35
999	84.33	193.27	220.67	210.62	240.23	223.64	247.39	234.34	239.31
999	89.11	216.29	242.17	243.27	257.77	252.77	273.59	259.47	226.18
999	100.36	228.11	255.05	252.45	270.57	266.96	285.63	267.64	243.82
999	106.12	206.46	229.07	221.74	251.26	240.62	261.61	245.19	245.25
999	111.32	246.58	267.95	269.88	288.06	292.36	309.21	294.44	254.21
999	116.82	248.68	283.45	279.54	296.96	301.63	324.63	312.64	273.72
999	118.81	271.43	297.48	304.6	319.76	307.95	341.96	315.22	273.81
999	119.06	273.49	288.11	294.21	307.76	306.95	330.29	300.47	273.85
999	121.79	281.54	301.48	304.11	324.56	332.02	352.11	327.87	276.76
999	123.77	230.07	245.21	247.15	262.1	255.97	275.21	248.66	277.21
999	124.37	261.53	278.72	283.06	295.15	295.18	307.51	275.03	276.97
999	127.48	251.69	271.3	282.2	284.03	275.2	295.22	262.05	275.25
999	130.86	246.1	259.57	262.42	274.08	269.21	290.36	259.05	250.84
999	131.91	228.55	250.36	251.84	263.66	247.43	267.73	237.67	239.57
999	133.22	210.67	231.43	233.24	248.5	237.79	256.19	234.13	228.63
999	134	183.9	209.03	205.66	218.78	211.41	224.85	206.75	222.46
999	135.57	184.49	203.67	202.13	218.59	213.58	225.38	205.85	212.54
999	138.97	183.51	201.45	201.93	216.91	210.46	224.64	210.95	197.56
999	146.69	192.5	213.29	208.26	226.64	219.6	233.28	214.86	195.48
999	150.04	184.35	208.23	204.72	216.46	214.77	224.21	205.7	201.02
999	169.76	187.8	205.35	202.82	217.92	209.48	224.79	205.35	190.98
999	179.94	181.43	204.3	196.23	213.99	212.48	223.52	211.14	203.52
999	184.37	188.78	213.48	203.58	226.08	218.85	233.84	217.37	203.56
999	190.01	200.96	219.13	216.02	236.83	228.01	244.53	230.23	223.39
999	191.68	190.37	221.88	210.96	235.22	228.02	246.79	240.91	224.65
999	198.07	211.34	242.26	239.22	255.78	255.39	275.95	273.41	234.13
999	211.57	241.32	267.99	262.46	286.93	284.56	308.46	299.06	246.16
999	220.44	234.26	263.19	255.57	273.08	271.99	285.06	256.46	227.33
999	223.66	239.61	253.31	255.86	269.79	264.78	283.55	260.56	208.88
999	227.1	203.19	229.6	226.2	244.88	243.46	256.4	241.87	221.29
999	235.76	223.87	251.45	252.61	274.33	270.37	291.22	285.83	245.61
999	239.48	210.15	235.34	230.42	257.7	250.11	267.41	255.54	248.29
999	242.9	245.66	267.35	271.64	288.93	288.82	305.79	285.06	264.96
999	247.18	231.79	258.16	255.15	276.67	269.48	287.28	270.01	232.43
999	250.07	195.44	225.08	221.33	234.96	228.48	244.22	223.05	208.17
999	257.84	202.67	226.28	228.27	237.92	240.9	255.58	242.25	202.55
999	268.68	143.76	168.96	155.75	177.29	167.47	180.32	168.01	194.86
999	271.7	149.07	170.87	164.64	189.15	176.75	188.66	173.96	191.7
999	274.72	157.52	176.46	169.41	191.55	186.17	196.79	184.71	193.67
999	280.75	203.88	226.72	219.91	247.18	235.18	252.45	232.22	211.36
999	284.43	173.51	205.82	189.64	208.06	201.92	216.42	198.4	227.75
999	290.28	195.94	221.26	215.46	238.81	235.53	249.38	238.96	224.84
999	298.16	202.93	229.8	227.1	252.2	245.7	262.75	252.72	220.91
999	302.25	180.91	208.59	200.58	224.8	218.77	234.63	223.69	236.6
999	314.35	187.37	207.78	206.22	224.64	219.78	236.76	214.46	249.37
999	322.37	231.05	255.28	253.95	275.31	269.12	289.88	270.86	253.89
999	332.78	244.42	262.6	262.07	276.09	274.41	290.48	266.02	278.08
999	342.05	183.66	204.19	199.49	214.89	214.36	224.38	203.89	227.84
999	351.99	176.61	202.37	189.07	214.44	202.32	218.29	202.74	217.63
999	361.78	177.88	198.47	191.35	216.21	202.33	216.81	201.13	187.14
999	376.69	236.93	262.58	260.77	282.55	281.52	298.77	278.58	221.37
999	392.32	253.5	275.5	281.51	297.37	298.34	316.5	297.05	261.62
999	402.5	257.19	275.13	272.41	289.88	284.7	302.91	274.14	279.46
999	410.88	284.15	298.77	307.61	326.03	330.24	352	321.19	280.3
999	419.26	235.28	255.28	252.8	272.98	269.57	287	263.58	272.77
871	160.46	158.312	180.223	176.162	199.733	183.966	198.368	181.781	187.583
871	167.97	139.416	162.7	161.046	179.286	167.498	178.181	166.629	189.232
871	172.98	164.244	190.329	188.161	208.7	195.584	210.769	196.196	197.185
871	177.99	162.687	186.812	182.914	201.027	186.394	206.384	194.555	193.91
871	183	161.948	180.989	178.189	196.781	185.946	201.184	186.655	207.037
871	188.01	147.678	176.363	169.659	190.173	175.508	190.612	181.829	216.398
871	193.01	171.672	200.346	201.27	222.075	208.697	226.262	212.431	222.832
871	198.02	181.319	209.803	209.412	233.898	211.737	232.926	219.395	234.002
871	203.03	213.992	231.995	233.271	253.568	249.718	262.254	239.199	242.713
871	208.03	240.774	257.06	273.828	282.343	269.697	294.686	261.788	235.525
871	213.04	223.411	242.336	246.772	268.408	252.418	273.982	250.394	247.222
871	219.47	264.503	279.478	290.497	305.514	297.169	319.301	290.868	232.891
871	223.06	209.052	229.17	228.528	247	230.515	253.938	231.403	209.735
871	228.07	200.525	225.601	234.167	250.226	234.809	255.117	240.014	225.656
871	233.44	186.117	210.105	211.561	235.545	224.192	241.827	224.899	238.941
871	238.89	230.597	248.473	250.317	277.632	267.361	283.565	262.749	246.502
871	244.29	175.169	203.386	204.079	222.184	212.505	233.472	212.113	256.452
871	254.73	201.286	219.478	226.625	245.839	230.427	254.177	238.236	198.184
871	259.95	141.7	165.201	161.725	177.944	160.87	179.176	168.475	206.443
871	265.16	188.275	213.932	212.324	224.623	220.014	236.134	216.775	213.171
871	270.39	186.023	210.758	211.806	226.052	215.716	234.502	218.447	192.386
871	275.61	163.767	187.067	180.483	204.21	187.773	204.153	189.199	195.05
871	280.82	184.524	209.793	212.544	232.546	216.789	239.496	231.176	211.679
871	286.05	199.003	221.561	221.924	238.671	229.195	248.489	233.319	229.091
871	292.13	228.143	256.343	254.474	268.276	264.256	283.168	259.167	215.098
871	297.35	232.8	254.766	262.227	278.99	272.466	296.858	280.07	216.866
871	302.57	172.265	201.88	198.435	218.62	203.816	222.537	209.166	237.4
871	307.79	206.454	230.413	232.278	251.049	234.24	254.298	233.308	237.265
871	313.01	243.755	261.856	270.555	285.234	275.642	300.938	277.018	244.19
871	318.23	207.138	230.748	226.852	248.861	232.08	252.755	231.188	253.29
871	323.03	235.619	249.343	255.702	273.035	260.362	281.646	254.78	256.167
871	326.8	214.084	236.793	240.894	252.146	234.434	251.887	219.912	264.613
871	330.57	310.004	315.179	341.153	343.041	331.124	355.849	308.682	270.873
871	334.34	226.198	252.885	255.76	269.266	259.009	284.717	265.447	282.677
871	339.25	222.306	248.581	256.576	272.653	263.264	286.058	269.323	253.949
871	345.66	167.11	189.962	187.757	205.596	189.337	209.238	194.351	206.615
871	352.06	179.21	204.433	199.88	223.631	211.389	226.549	213.497	217.483
871	358.48	184.802	204.871	210.193	228.559	216.791	233.111	213.97	194.067
871	364.88	141.904	167.274	163.728	185.896	170.921	186.763	179.931	197.013
871	371.29	183.352	209.296	208.535	230.005	213.577	236.58	220.686	201.959
871	377.7	215.421	238.104	245.058	261.771	252.123	274.863	254.177	225.108
871	384.11	223.718	243.1	247.617	265.615	255.808	276.902	255.845	234.922
871	390.51	249.79	264.021	275.087	288.396	283.768	306.724	273.461	252.279
871	396.93	221.144	242.711	255.183	268.05	252.053	272.466	242.189	270.475
871	402.45	242.411	261.392	267.713	276.164	263.112	282.9	245.343	279.495
871	406.85	270.388	281.346	294.095	304.925	296.08	309.894	264.533	281.587
871	411.26	254.795	269.105	279.128	283.801	272.215	296.586	263.989	279.807
871	415.66	220.347	237.129	246.069	261.428	243.469	263.644	239.389	272.266
871	420.63	215.261	238.711	243.001	258.607	248.303	264.174	240.063	271.601

## Sheet: Table 4. d18O and d13C
Supplementary Information Table 4. d18O, d13C of benthic foraminifera from site 999 and 871 (C. wuellestorfi and U. peregrina) and G. ruber (site 871)
Age	Age in thousands of years (ky).
Species	Isotopes measured on Cibicidoides wuellestorfi, Uvigerina peregrina, Globigerinoides ruber sensu stricto (white) and Globigerinoides ruber sensu lato.
d18O	Oxygen isotopic composition (permil)
d13C	Carbon isotopic composition (permil)
ODP core site	Age	species	d18O	d13C			ODP core site	Age	species	d18O	d13C	species	d18O	d13C	species	d18O	d13C
999	268.68	C. wuellestorfi	3.73	0.93			871	160.46	U. peregrina	4.11	-0.21	G. ruber ss	NA	NA	G. ruber sl	NA	NA
999	270.49	C. wuellestorfi	3.72	0.88			871	167.973	U. peregrina	3.94	-0.26	G. ruber ss	-1.18	1.22	G. ruber sl	-1.51	0.78
999	271.7	C. wuellestorfi	3.21	0.79			871	172.982	U. peregrina	4.05	-0.32	G. ruber ss	-1.38	1.15	G. ruber sl	-1.25	0.86
999	273.21	C. wuellestorfi	3.28	0.69			871	177.991	U. peregrina	4.1	-0.23	G. ruber ss	-1.4	1.16	G. ruber sl	-1.65	1.47
999	274.72	C. wuellestorfi	3.52	0.77			871	183	U. peregrina	3.93	-0.33	G. ruber ss	-1.38	1.14	G. ruber sl	-1.58	1.25
999	276.22	C. wuellestorfi	3.41	0.74			871	188.008	U. peregrina	3.98	-0.32	G. ruber ss	-1.15	1.23	G. ruber sl	-1.35	1.04
999	277.73	C. wuellestorfi	3.7	0.71			871	193.008	U. peregrina	3.48	-0.19	G. ruber ss	-1.38	1.29	G. ruber sl	-1.51	1.29
999	279.24	C. wuellestorfi	3.6	0.96			871	203.025	U. peregrina	3.27	0.04	G. ruber ss	-1.49	1.66	G. ruber sl	-2.01	1.64
999	280.75	C. wuellestorfi	3.63	0.76			871	208.034	U. peregrina	3.46	0.03	G. ruber ss	-2.05	1.73	G. ruber sl	-1.82	1.54
999	282.48	C. wuellestorfi	3.25	0.89			871	213.043	U. peregrina	3.68	-0.04	G. ruber ss	-1.39	1.34	G. ruber sl	-1.69	1.32
999	284.43	C. wuellestorfi	3.14	0.82			871	219.47	U. peregrina	3.7	-0.16	G. ruber ss	NA	NA	G. ruber sl	NA	NA
999	286.38	C. wuellestorfi	3.29	0.86			871	223.061	U. peregrina	4.04	-0.31	G. ruber ss	-1.46	1.19	G. ruber sl	-1.74	1.38
999	290.28	C. wuellestorfi	3.26	1.11			871	228.07	U. peregrina	3.6	-0.16	G. ruber ss	-1.64	1.4	G. ruber sl	-1.71	1.18
999	292.24	C. wuellestorfi	3.49	1.04			871	233.438	U. peregrina	4.19	-0.13	G. ruber ss	-1.6	1.8	G. ruber sl	-1.77	1.33
999	294.19	C. wuellestorfi	3.64	0.95			871	238.891	U. peregrina	2.9	0.11	G. ruber ss	-1.72	1.21	G. ruber sl	-1.9	1.49
999	296.73	C. wuellestorfi	2.79	0.92			871	244.29	U. peregrina	3.69	-0.07	G. ruber ss	-1.64	1.38	G. ruber sl	-1.55	1.34
999	298.16	C. wuellestorfi	3.43	0.94			871	254.727	U. peregrina	3.99	-0.24	G. ruber ss	-1.28	0.97	G. ruber sl	-1.44	1.13
999	300.2	C. wuellestorfi	3.28	0.84			871	259.95	U. peregrina	4	-0.26	G. ruber ss	-1.12	1.28	G. ruber sl	-1.33	1.15
999	302.25	C. wuellestorfi	3.22	0.9			871	265.164	U. peregrina	3.91	-0.3	G. ruber ss	-1.25	1.22	G. ruber sl	-1.15	1.24
999	304.3	C. wuellestorfi	3.36	0.65			871	270.387	U. peregrina	3.97	-0.49	G. ruber ss	-1.06	1.27	G. ruber sl	-1.18	1.23
999	306.34	C. wuellestorfi	3.16	1.01			871	275.61	U. peregrina	3.9	-0.26	G. ruber ss	-1.12	1.45	G. ruber sl	-1.41	1.45
999	308.35	C. wuellestorfi	3.22	0.88			871	280.824	U. peregrina	3.75	-0.25	G. ruber ss	-1.2	1.59	G. ruber sl	-1.44	1.17
999	310.35	C. wuellestorfi	3.51	0.56			871	286.047	U. peregrina	3.8	0.02	G. ruber ss	-1.74	1.48	G. ruber sl	-1.54	1.45
999	312.35	C. wuellestorfi	3.09	0.92			871	292.13	U. peregrina	3.39	0.07	G. ruber ss	-1.54	1.43	G. ruber sl	NA	NA
999	314.35	C. wuellestorfi	3.03	0.84			871	297.353	U. peregrina	3.77	-0.15	G. ruber ss	NA	NA	G. ruber sl	NA	NA
999	316.36	C. wuellestorfi	2.87	0.51			871	307.79	U. peregrina	3.48	0.03	G. ruber ss	-1.46	1.52	G. ruber sl	-1.57	1.65
999	318.36	C. wuellestorfi	2.69	0.87			871	313.013	U. peregrina	3.64	-0.1	G. ruber ss	-1.25	1.44	G. ruber sl	-1.67	1.43
999	320.16	C. wuellestorfi	2.7	0.74			871	318.227	U. peregrina	3.17	0.06	G. ruber ss	-1.82	1.71	G. ruber sl	-1.91	1.53
999	322.37	C. wuellestorfi	2.93	0.89			871	323.025	U. peregrina	3.34	0.04	G. ruber ss	-1.83	1.73	G. ruber sl	-1.66	1.37
999	324.77	C. wuellestorfi	2.4	0.73			871	326.8	U. peregrina	3.83	-0.15	G. ruber ss	-1.62	1.39	G. ruber sl	-1.56	1.57
999	327.98	C. wuellestorfi	2.9	0.82			871	330.565	U. peregrina	3.18	-0.05	G. ruber ss	-1.57	1.08	G. ruber sl	NA	NA
999	330.64	C. wuellestorfi	2.34	0.39			871	334.34	U. peregrina	3.6	-0.03	G. ruber ss	-1.19	1.25	G. ruber sl	-1.42	0.95
999	332.78	C. wuellestorfi	2.6	0.6			871	339.255	U. peregrina	4.37	-0.12	G. ruber ss	-1.26	1.32	G. ruber sl	-1.2	1.01
999	334.9	C. wuellestorfi	2.26	0.5			871	345.66	U. peregrina	3.52	-0.07	G. ruber ss	-1.17	1.37	G. ruber sl	-1.34	1.19
999	336.86	C. wuellestorfi	3.81	0.89			871	352.064	U. peregrina	3.94	-0.11	G. ruber ss	-1.04	1.28	G. ruber sl	-1.15	1.08
999	339.45	C. wuellestorfi	3.46	0.92			871	358.48	U. peregrina	4.01	-0.1	G. ruber ss	-1.08	1.26	G. ruber sl	-1.07	1.41
999	342.05	C. wuellestorfi	4.01	0.73			871	364.884	U. peregrina	4.04	-0.22	G. ruber ss	-1.31	1.05	G. ruber sl	-1.13	1.67
999	344.64	C. wuellestorfi	4.19	0.89			871	371.289	U. peregrina	4.04	-0.22	G. ruber ss	-1.08	1.69	G. ruber sl	-1.29	1.66
999	347.09	C. wuellestorfi	4.06	0.88			871	377.704	U. peregrina	3.63	0	G. ruber ss	NA	NA	G. ruber sl	NA	NA
999	349.53	C. wuellestorfi	3.9	0.99			871	384.109	U. peregrina	3.66	0.02	G. ruber ss	-1.17	1.48	G. ruber sl	-1.47	1.59
999	351.99	C. wuellestorfi	3.58	0.85			871	390.514	U. peregrina	3.62	-0.13	G. ruber ss	-1.55	1.55	G. ruber sl	-1.71	1.73
999	354.44	C. wuellestorfi	3.07	0.68			871	396.929	U. peregrina	3.73	0.03	G. ruber ss	-1.28	1.53	G. ruber sl	-1.56	1.85
999	359.33	C. wuellestorfi	3.39	0.85			871	402.448	U. peregrina	2.92	0.28	G. ruber ss	-1.57	1.68	G. ruber sl	NA	NA
999	361.78	C. wuellestorfi	3.53	1.06			871	406.85	U. peregrina	3.54	0.01	G. ruber ss	-1.57	1.58	G. ruber sl	-1.89	1.64
999	368.87	C. wuellestorfi	3.44	0.73			871	411.259	U. peregrina	3.49	-0.02	G. ruber ss	-1.35	1.13	G. ruber sl	-1.71	1.35
999	372.78	C. wuellestorfi	3.7	1.05			871	415.66	U. peregrina	3.34	0.11	G. ruber ss	-1.17	1.41	G. ruber sl	-0.83	1.26
999	376.69	C. wuellestorfi	3.51	0.81			871	425.601	U. peregrina	3.99	0.03	G. ruber ss	-0.93	1.24	G. ruber sl	-0.92	1.18
999	380.6	C. wuellestorfi	3.46	1.14			871	436.591	U. peregrina	4.4	-0.21	G. ruber ss	NA	NA	G. ruber sl	NA	NA
999	384.5	C. wuellestorfi	3.11	0.91			871	447.582	U. peregrina	4.02	-0.14	G. ruber ss	-1.08	1.33	G. ruber sl	-1.29	1.24
999	388.41	C. wuellestorfi	3.17	0.84			871	458.572	U. peregrina	4.06	-0.21	G. ruber ss	-0.95	1.46	G. ruber sl	-0.91	1.27
999	392.32	C. wuellestorfi	3.01	0.75			871	469.563	U. peregrina	4.02	-0.05	G. ruber ss	-1.17	1.23	G. ruber sl	-1.1	1.29
999	396.21	C. wuellestorfi	2.94	0.13			871	480.553	U. peregrina	3.63	0.14	G. ruber ss	-1.4	1.39	G. ruber sl	-1.08	1.36
999	398.3	C. wuellestorfi	2.72	0.88			871	493.234	U. peregrina	2.95	0.34	G. ruber ss	-1.19	1.25	G. ruber sl	-1.09	1.31
999	400.4	C. wuellestorfi	2.45	0.4			871	504.452	U. peregrina	3.6	0.22	G. ruber ss	-1.12	1.28	G. ruber sl	-1.22	1.51
999	402.5	C. wuellestorfi	2.47	0.04			871	512.636	U. peregrina	3.48	0.36	G. ruber ss	-1.31	1.86	G. ruber sl	NA	NA
999	404.59	C. wuellestorfi	2.76	0.77			871	520.821	U. peregrina	3.54	0.35	G. ruber ss	NA	NA	G. ruber sl	NA	NA
999	406.69	C. wuellestorfi	2.46	0.62			871	529.005	U. peregrina	3.32	0.11	G. ruber ss	-1.53	1.86	G. ruber sl	-1.62	1.48
999	408.78	C. wuellestorfi	2.47	0.71			871	537.208	U. peregrina	3.8	0.1	G. ruber ss	-1.2	1.55	G. ruber sl	-1.4	1.8
999	412.97	C. wuellestorfi	2.96	0.28
999	415.07	C. wuellestorfi	2.79	0.64
999	419.26	C. wuellestorfi	2.66	0.48

## Sheet: Table 5. Fragmentation index
Supplementary Information Table 5. Fragmentation index and percentage sand from ODP site 871.
Age	Age in thousands of years (ky).
Fragmentation index	Fragmentation index from fragments count calcultated following Howard and Prell (1994)
% Sand fraction	Percentage sand fraction defined as the ratio of sediments above 63 um relative to whole sediment mass.
Age	Fragmentation index	% Sand fraction
160.46	30.95	76
167.97	27.33	77
172.98	29.51	77
177.99	30.8	75
183	32.63	76
188.01	29.77	73
193.01	48.51	69
198.02	NA	66
203.03	37.79	62
208.03	34.63	62
213.04	33.65	64
219.47	26.38	66
223.06	27.72	68
228.07	5.18	70
233.44	33.33	68
238.89	30.77	70
244.29	22.25	71
249.51	NA	73
254.73	22.17	77
259.95	25.77	78
265.16	33.53	73
270.39	30.83	71
275.61	30.5	69
280.82	36.16	67
286.05	31.65	61
292.13	27.99	60
297.35	30.87	57
302.57	NA	57
307.79	30.93	56
313.01	33.12	54
318.23	32.83	57
323.03	30.67	54
326.8	15.61	60
330.57	18.02	61
334.34	23.09	69
339.25	25.36	71
345.66	25.14	74
352.06	29.78	67
358.48	27.36	65
364.88	24.26	66
371.29	30.22	61
377.7	33.67	55
384.11	39.32	56
390.51	35.96	51
396.93	36.41	51
402.45	26.45	53
406.85	20.49	58
411.26	21.85	66
415.66	17.92	67
